# Supplementary material for: Operandodual beam FTIR spectroscopy unravels the promotional effect of Zn on HZSM-5 in iso-butane aromatization
Source: Royal Society of Chemistry journal article supplement (doi:10.1039/c9cy00136k), 2019-01-01
Supplement: c9cy00136k1.pdf [file c9cy00136k1.pdf]

## Supplementary Materials

### ***Operando* dual beam FTIR unravels promotional effect of Zn for HZSM-5 in short-chain alkane aromatization**

Jiaxu Liu<sup>a</sup>, Ning He<sup>a</sup>, Wei Zhou<sup>a</sup>, Miao Shu<sup>b</sup>, Long Lin<sup>a</sup>, Jilei Wang<sup>a</sup>, Rui Si<sup>b</sup>, Guang Xiong<sup>a</sup>, Qin Xin<sup>c</sup>, Hongchen Guo<sup>a\*</sup>

<sup>a</sup> State Key Laboratory of Fine Chemicals & Department of Catalytic Chemistry and Engineering, Dalian University of Technology, Dalian, 116024, China

<sup>b</sup> Shanghai Synchrotron Radiation Facility, Shanghai Institute of Applied Physics, Chinese Academy of Sciences, Shanghai 201204, China

<sup>c</sup> State Key Laboratory of Catalysis, Dalian Institute of Chemical Physics, Dalian, 116023, China

\*Corresponding author: [hongchenguo@dlut.edu.cn](mailto:hongchenguo@dlut.edu.cn)

### Content

|                        |           |
|------------------------|-----------|
| <b>Table S1</b> .....  | <b>S2</b> |
| <b>Figure S1</b> ..... | <b>S3</b> |
| <b>Figure S2</b> ..... | <b>S3</b> |
| <b>Figure S3</b> ..... | <b>S4</b> |
| <b>Figure S4</b> ..... | <b>S5</b> |
| <b>Figure S5</b> ..... | <b>S6</b> |
| <b>Figure S6</b> ..... | <b>S7</b> |
| <b>Figure S7</b> ..... | <b>S8</b> |

**Table S1** Catalytic performance of HZSM-5 and Zn/HZSM-5 in *iso*-butane aromatization under different pressures

| Cat.                   | Pressure<br>/kPa | Con.<br>% | Product Selectivity (wt %)                                                                                                                   |                                                                                                     |                    |
|------------------------|------------------|-----------|----------------------------------------------------------------------------------------------------------------------------------------------|-----------------------------------------------------------------------------------------------------|--------------------|
|                        |                  |           | Alkanes<br>(C <sub>1</sub> <sup>0</sup> +C <sub>2</sub> <sup>0</sup> + C <sub>3</sub> <sup>0</sup> + <i>n</i> -C <sub>4</sub> <sup>0</sup> ) | Olefins<br>(C <sub>2</sub> <sup>=</sup> +C <sub>3</sub> <sup>=</sup> +C <sub>4</sub> <sup>=</sup> ) | Aromatics<br>(BTX) |
| HZ                     | 101.33           | 87.51     | 57.11                                                                                                                                        | 13.37                                                                                               | 29.52              |
|                        | 91.20            | 79.06     | 46.23                                                                                                                                        | 36.46                                                                                               | 17.31              |
|                        | 81.06            | 75.01     | 46.50                                                                                                                                        | 39.07                                                                                               | 14.43              |
|                        | 60.80            | 66.13     | 36.10                                                                                                                                        | 54.30                                                                                               | 9.60               |
| Zn <sub>1.03</sub> /HZ | 101.33           | 95.46     | 40.04                                                                                                                                        | 23.02                                                                                               | 36.94              |
|                        | 91.20            | 93.33     | 46.68                                                                                                                                        | 31.85                                                                                               | 21.47              |
|                        | 81.06            | 85.57     | 36.34                                                                                                                                        | 45.02                                                                                               | 18.64              |
|                        | 60.80            | 73.46     | 26.60                                                                                                                                        | 60.42                                                                                               | 12.98              |
| Zn <sub>2.34</sub> /HZ | 101.33           | 97.05     | 41.42                                                                                                                                        | 16.69                                                                                               | 41.89              |
|                        | 91.20            | 96.94     | 44.83                                                                                                                                        | 17.14                                                                                               | 38.03              |
|                        | 81.06            | 94.03     | 33.73                                                                                                                                        | 36.67                                                                                               | 29.60              |
|                        | 60.80            | 90.55     | 39.82                                                                                                                                        | 41.41                                                                                               | 19.07              |
| Zn <sub>8.47</sub> /HZ | 101.33           | 99.32     | 54.80                                                                                                                                        | 6.22                                                                                                | 38.98              |
|                        | 91.20            | 96.03     | 46.60                                                                                                                                        | 22.20                                                                                               | 31.20              |
|                        | 81.06            | 94.27     | 47.91                                                                                                                                        | 23.14                                                                                               | 28.95              |
|                        | 60.80            | 93.54     | 47.08                                                                                                                                        | 32.46                                                                                               | 20.16              |

Reaction conditions: fixed-bed reactor, *T*=560 °C, *WHSV*=0.75h<sup>-1</sup>, *TOS*=24 h.

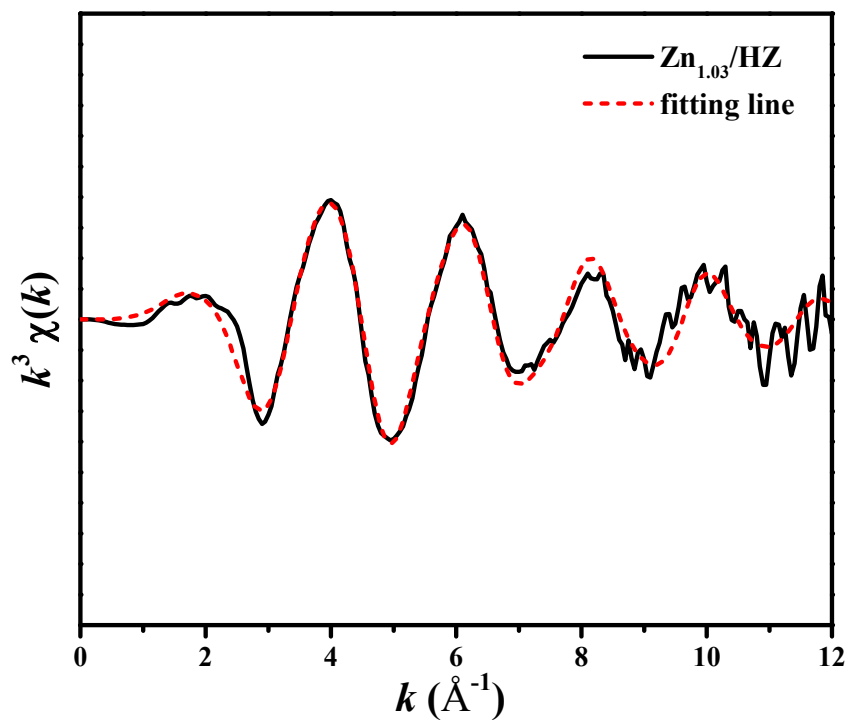

**Figure S1** EXAFS functions and the fittings of Zn<sub>1.03</sub>/HZSM-5 catalyst for the Zn K filtered  $k^3$ -weighted  $\chi(k)$  and the Fourier Transform function in the  $k$  range of 3-12Å<sup>-1</sup>.

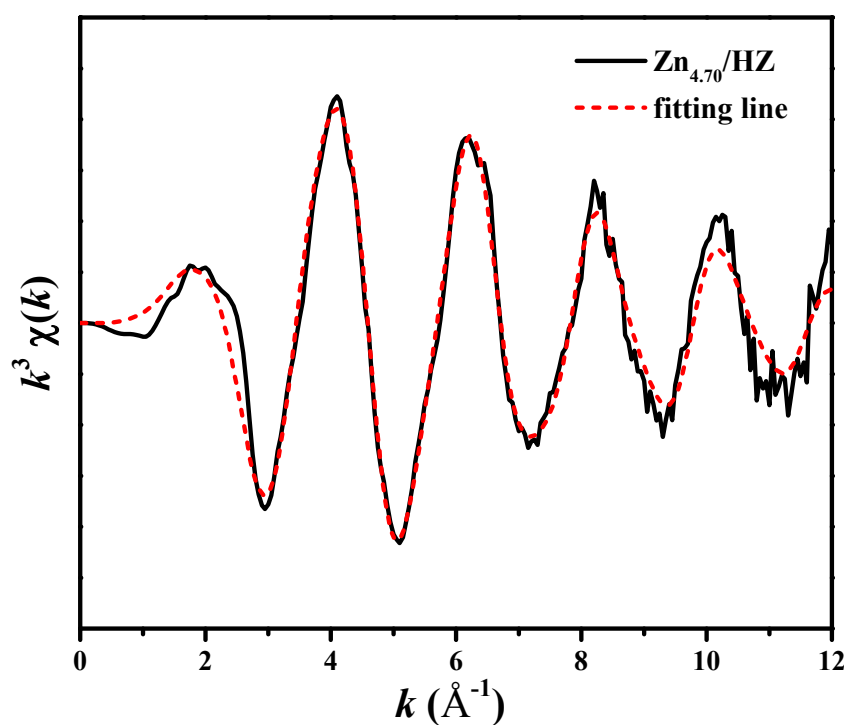

**Figure S2** EXAFS functions and the fittings of Zn<sub>4.70</sub>/HZSM-5 catalyst for the Zn K filtered  $k^3$ -weighted  $\chi(k)$  and the Fourier Transform function in the  $k$  range of 3-12Å<sup>-1</sup>.

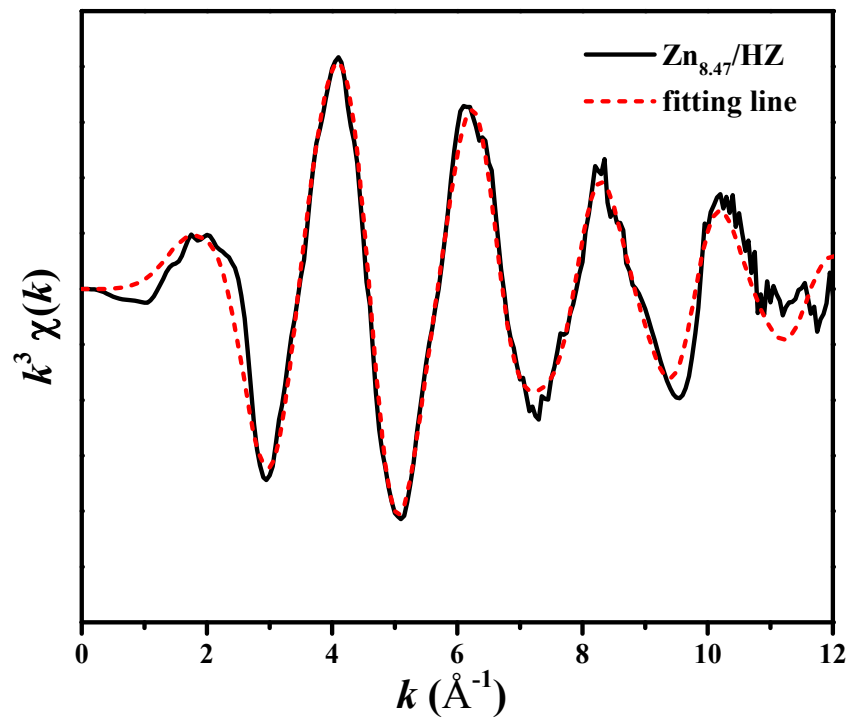

**Figure S3** EXAFS functions and the fittings of  $\text{Zn}_{8.47}/\text{HZSM-5}$  catalyst for the Zn  $K$  filtered  $k^3$ -weighted  $\chi(k)$  and the Fourier Transform function in the  $k$  range of  $3\text{-}12\text{\AA}^{-1}$ .

## HZSM-5

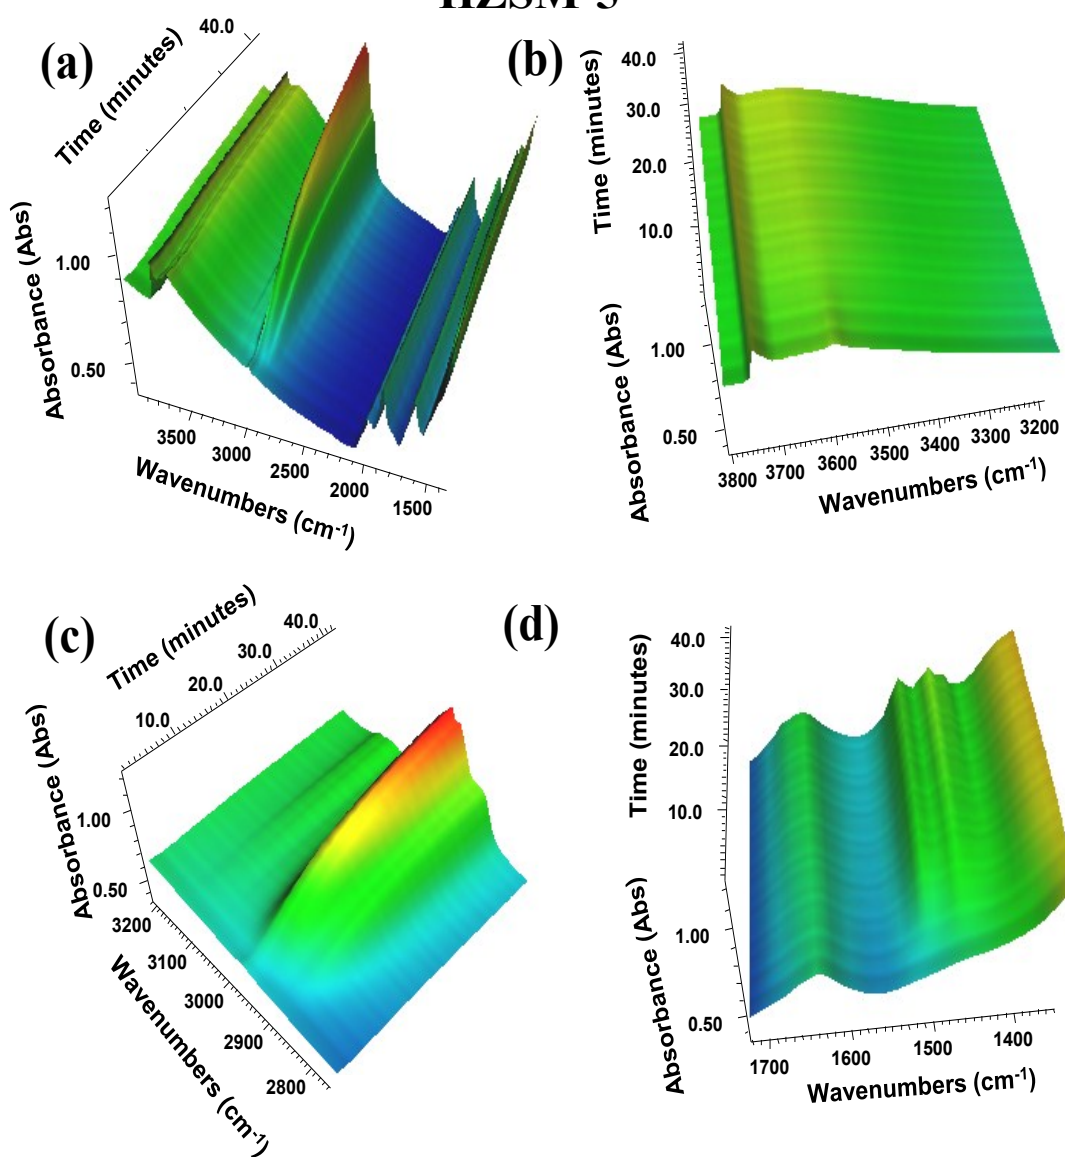

**Figure S4** Three-dimensional FTIR profiles of propene aromatization on HZSM-5 at 250°C and 60.80 kPa, obtained using DB-FTIR in a flowing mixture of propene and nitrogen gas (6 % propene - 94 % nitrogen) for 40 minutes, GHSV=1080  $\text{h}^{-1}$  (a) 4000-1300  $\text{cm}^{-1}$ , (b) 3800-3100  $\text{cm}^{-1}$ , (c) 3200-2700  $\text{cm}^{-1}$  and (d) 1700-1300  $\text{cm}^{-1}$ .

## Zn<sub>1.03</sub>/HZSM-5

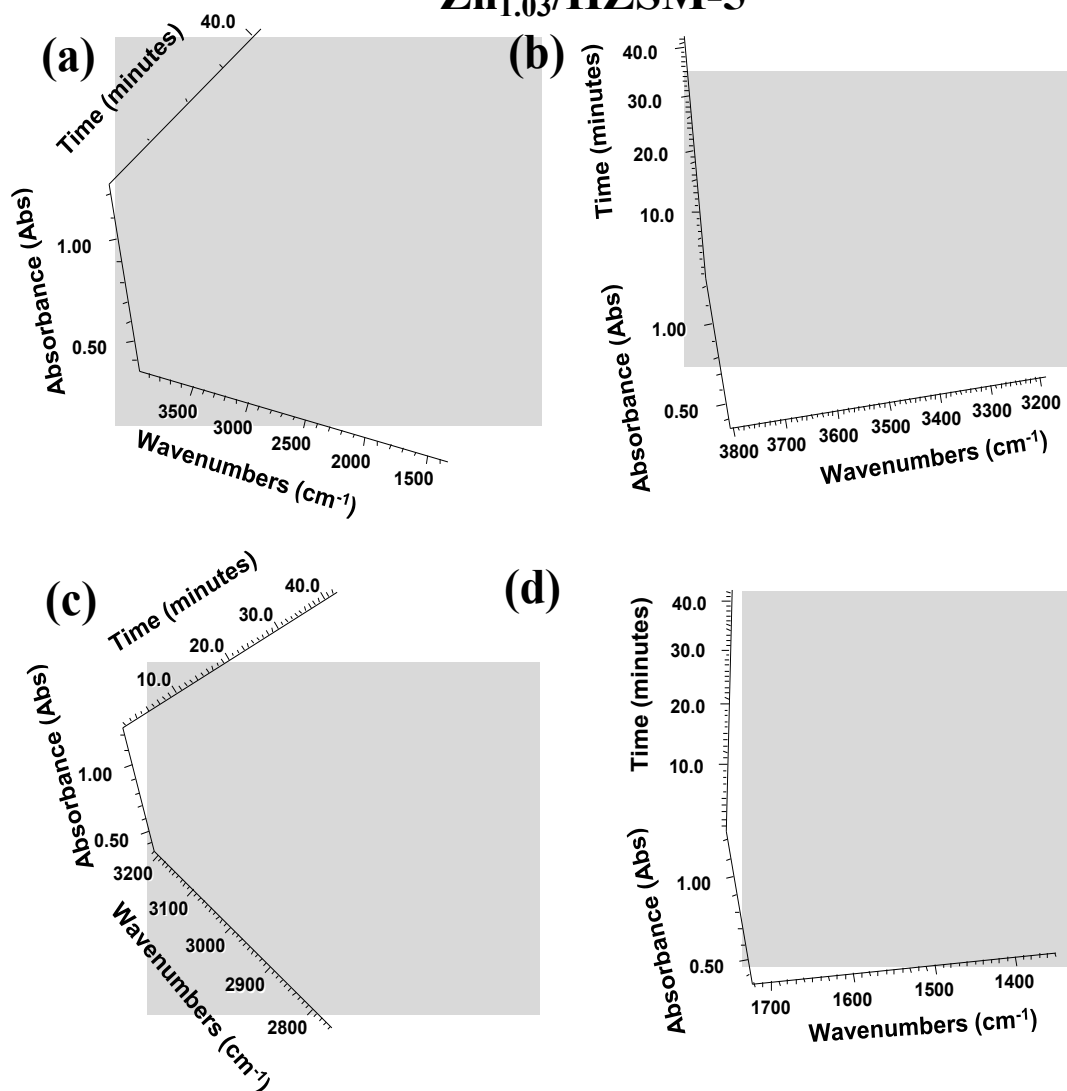

**Figure S5** Three-dimensional FTIR profiles of propene aromatization on Zn<sub>1.03</sub>/HZSM-5 at 250°C and 60.80 kPa, obtained using DB-FTIR in a flowing mixture of propene and nitrogen gas (6 % propene - 94 % nitrogen) for 40 minutes, GHSV=1080 h<sup>-1</sup> (a) 4000-1300 cm<sup>-1</sup>, (b) 3800-3100 cm<sup>-1</sup>, (c) 3200-2700 cm<sup>-1</sup> and (d) 1700-1300 cm<sup>-1</sup>.

## Zn<sub>2.34</sub>/HZSM-5

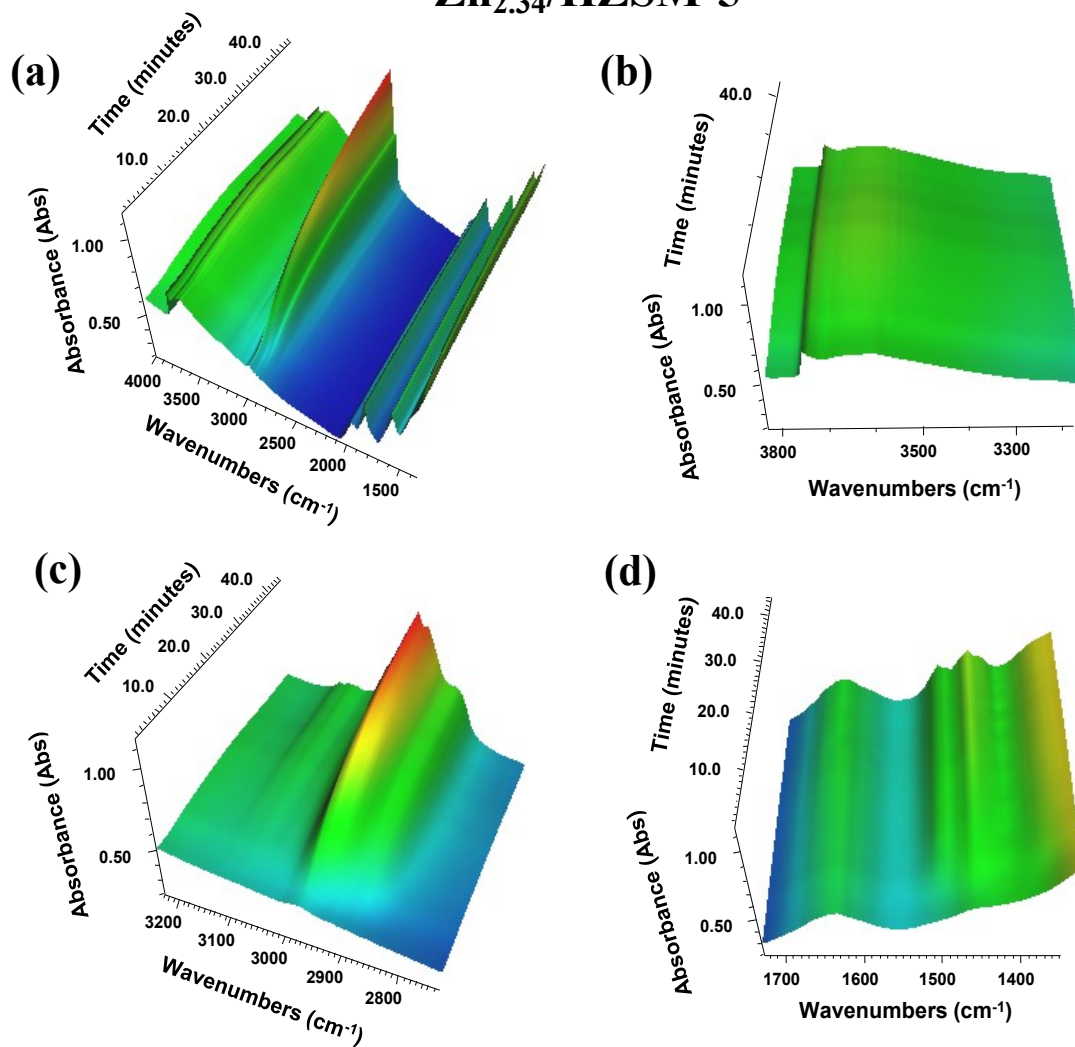

**Figure S6** Three-dimensional FTIR profiles of propene aromatization on Zn<sub>2.34</sub>/HZSM-5 at 250°C and 60.80 kPa, obtained using DB-FTIR in a flowing mixture of propene and nitrogen gas (6 % propene - 94 % nitrogen) for 40 minutes, GHSV=1080 h<sup>-1</sup> (a) 4000-1300 cm<sup>-1</sup>, (b) 3800-3100 cm<sup>-1</sup>, (c) 3200-2700 cm<sup>-1</sup> and (d) 1700-1300 cm<sup>-1</sup>.

## Zn<sub>8.47</sub>/HZSM-5

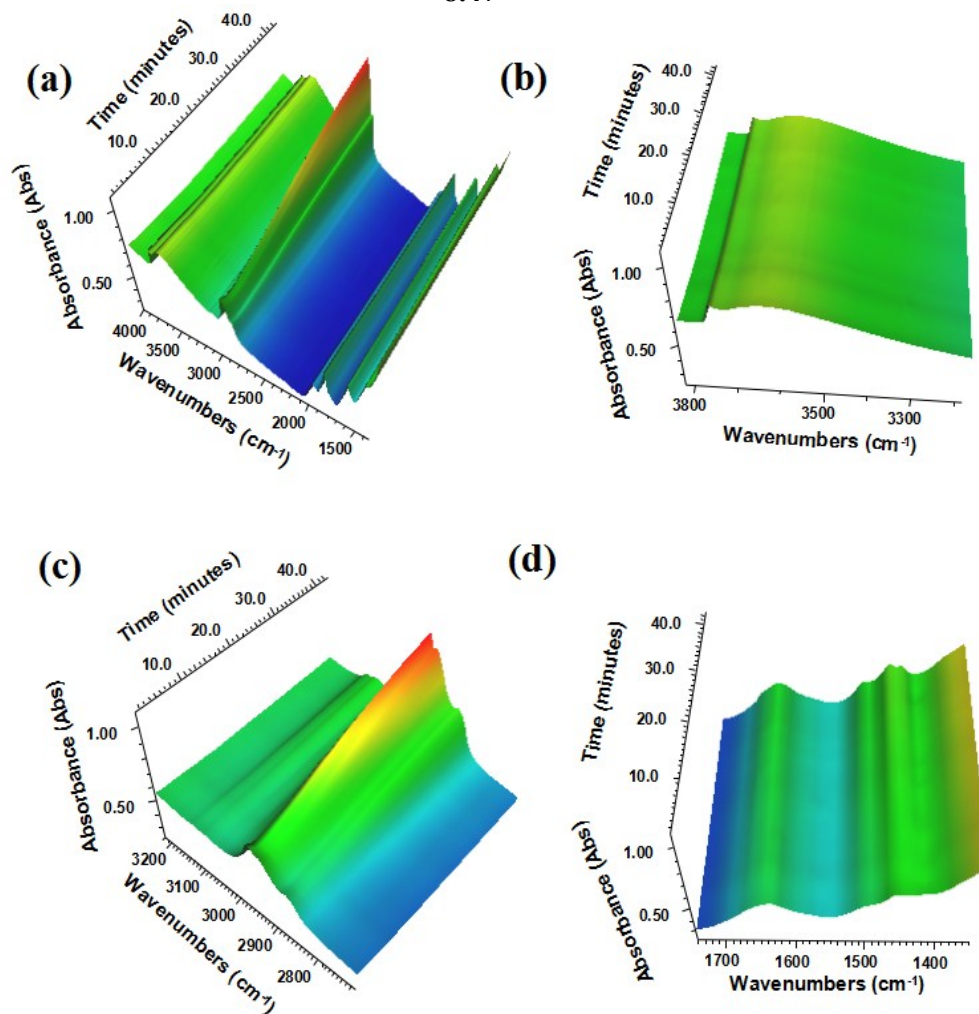

**Figure S7** Three-dimensional FTIR profiles of propene aromatization on Zn<sub>8.47</sub>/HZSM-5 at 250°C and 60.80 kPa, obtained using DB-FTIR in a flowing mixture of propene and nitrogen gas (6 % propene - 94 % nitrogen) for 40 minutes, GHSV=1080 h<sup>-1</sup> (a) 4000-1300 cm<sup>-1</sup>, (b) 3800-3100 cm<sup>-1</sup>, (c) 3200-2700 cm<sup>-1</sup> and (d) 1700-1300 cm<sup>-1</sup>.
